# Supplementary material for: A highly sensitive eco-scale method for mercury determination in water and food using photochemical vapor generation and miniaturized instrumentation for capacitively coupled plasma microtorch optical emission spectrometry
Source: Royal Society of Chemistry journal article supplement (doi:10.1039/c8ja00054a), 2018-01-01
Supplement: c8ja00054a1.pdf [file c8ja00054a1.pdf]

ESI 1. Protocol for the microwave-assisted acid digestion of fish fillet and other foods for Hg determination after derivatization with SnCl<sub>2</sub>

| Parameter              | Step |     |     |     |
|------------------------|------|-----|-----|-----|
|                        | 1    | 2   | 3   | 4   |
| Temperature (°C)       | 170  | 200 | 100 | 100 |
| Hold (min)             | 15   | 40  | 10  | 10  |
| Power <sup>a</sup> (%) | 80   | 80  | 0   | 0   |

<sup>a</sup> 100% corresponds to 1450 W

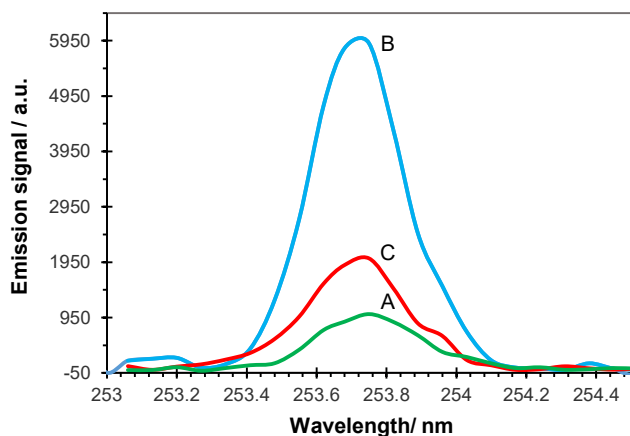

ESI 2. Emission spectrum of Hg by UV-PVG- $\mu$ CCP-OES without preconcentration. Experimental conditions: 15 W plasma power; 100 mL min<sup>-1</sup> Ar; 1.6 mm observation height; Hg concentration: A, B—standard solution, 0.2 and 1 ng mL<sup>-1</sup> Hg in 0.6 mol L<sup>-1</sup> HCOOH; C—0.4 ng mL<sup>-1</sup> Hg obtained from 0.2 g ERM-CE464 Tuna fish extracted in 10 mL HCOOH and 250 fold diluted

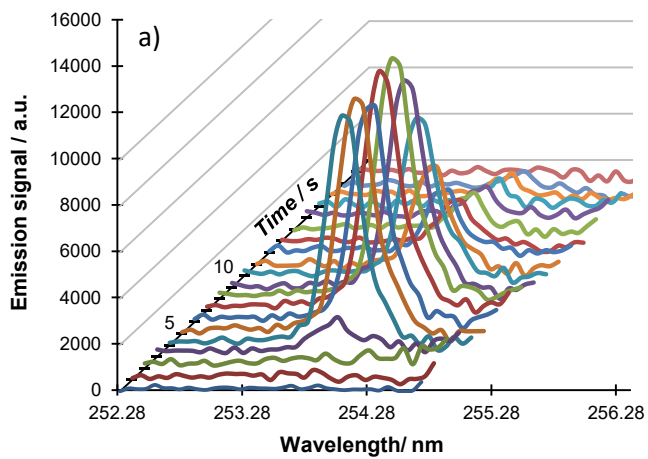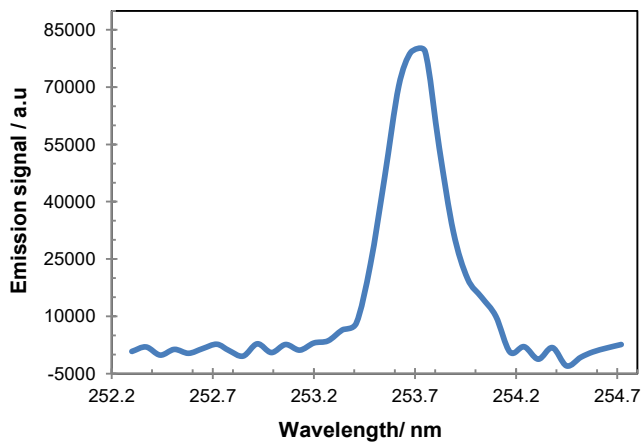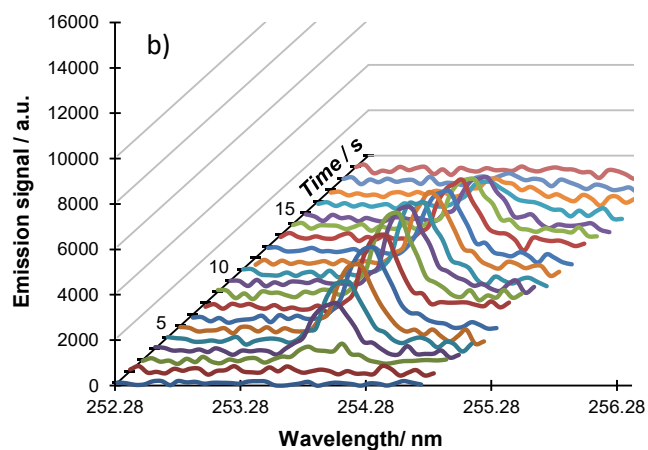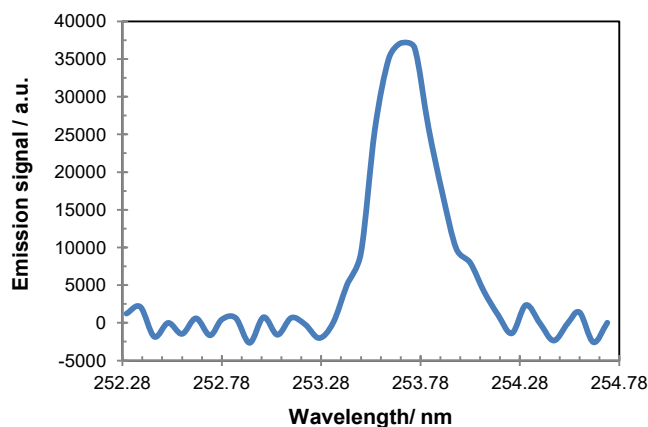

ESI 3. Episodic emission spectra (20) of Hg and total spectra by UV-PVG- $\mu$ CCP-OES with preconcentration. Experimental conditions: 15 W plasma power; 100 mL  $\text{min}^{-1}$  Ar; 1.6 mm observation height; Hg concentration: a–standard solution, 0.07  $\text{ng mL}^{-1}$  Hg in 0.6 mol  $\text{L}^{-1}$  HCOOH; b– 0.03  $\text{ng mL}^{-1}$  Hg obtained from 20 ml ERM-CA615 Groundwater diluted to 25 ml in 0.6 mol  $\text{L}^{-1}$  HCOOH

Matrix pattern in solution of CRMs and fish fillet/mushroom test samples in the presence of 0.6 mol L<sup>-1</sup> HCOOH

|                    | Concomitant concentration |                |                 |                 |                       |                 |                 |                 |                 |                       |                               |                                |                                |
|--------------------|---------------------------|----------------|-----------------|-----------------|-----------------------|-----------------|-----------------|-----------------|-----------------|-----------------------|-------------------------------|--------------------------------|--------------------------------|
|                    | (mg L <sup>-1</sup> )     |                |                 |                 | (μg L <sup>-1</sup> ) |                 |                 |                 |                 | (mg l <sup>-1</sup> ) |                               |                                |                                |
|                    | Na <sup>a</sup>           | K <sup>a</sup> | Ca <sup>a</sup> | Mg <sup>a</sup> | Al <sup>b</sup>       | Cr <sup>b</sup> | Cu <sup>b</sup> | Fe <sup>b</sup> | Zn <sup>b</sup> | Cl <sup>-c</sup>      | NO <sub>3</sub> <sup>-c</sup> | SO <sub>4</sub> <sup>2-c</sup> | PO <sub>4</sub> <sup>3-c</sup> |
| Min                | 0.1                       | 0.5            | 0.1             | 0.1             | 3                     | 40              | 2               | 33              | 3               | -                     | -                             | -                              | -                              |
| Max                | 6.9                       | 5.8            | 2.3             | 1.1             | 30                    | 52              | 30              | 117             | 100             | -                     | -                             | -                              | -                              |
| Average            | 1.3                       | 1.6            | 0.7             | 0.4             | 9                     | 46              | 4               | 68              | 30              | -                     | -                             | -                              | -                              |
| Standard deviation | 1.7                       | 1.3            | 0.5             | 0.3             | 10                    | 3               | 8               | 25              | 30              | -                     | -                             | -                              | -                              |

Matrix pattern in solution of CRMs and test samples of food of animal and vegetal origin in the presence of 0.6 mol L<sup>-1</sup> HCOOH<sup>d</sup>

|                    | Concomitant concentration |                |                 |                 |                       |                 |                 |                 |                 |                       |                               |                                |                                |
|--------------------|---------------------------|----------------|-----------------|-----------------|-----------------------|-----------------|-----------------|-----------------|-----------------|-----------------------|-------------------------------|--------------------------------|--------------------------------|
|                    | (mg L <sup>-1</sup> )     |                |                 |                 | (μg L <sup>-1</sup> ) |                 |                 |                 |                 | (mg l <sup>-1</sup> ) |                               |                                |                                |
|                    | Na <sup>a</sup>           | K <sup>a</sup> | Ca <sup>a</sup> | Mg <sup>a</sup> | Al <sup>b</sup>       | Cr <sup>b</sup> | Cu <sup>b</sup> | Fe <sup>b</sup> | Zn <sup>b</sup> | Cl <sup>-c</sup>      | NO <sub>3</sub> <sup>-c</sup> | SO <sub>4</sub> <sup>2-c</sup> | PO <sub>4</sub> <sup>3-c</sup> |
| Min                | 0.1                       | 0.1            | 0.1             | 0.1             | 3                     | 2               | 2               | 2               | 3               | -                     | -                             | 0.1                            | 0.1                            |
| Max                | 4.2                       | 3.9            | 26.4            | 11.3            | 46                    | 88              | 82              | 3190            | 2765            | -                     | -                             | 2.6                            | 1.0                            |
| Average            | 0.7                       | 1.2            | 2.1             | 0.9             | 8                     | 46              | 7               | 215             | 170             | -                     | -                             | 0.8                            | 0.2                            |
| Standard deviation | 1.1                       | 1.1            | 6.0             | 2.5             | 12                    | 15              | 18              | 720             | 630             | -                     | -                             | 0.8                            | 0.3                            |

Matrix pattern in CRMs and test water sample in the presence of 0.6 mol L<sup>-1</sup> HCOOH<sup>e</sup>

|                    | Concomitant concentration |                |                 |                 |                       |                 |                 |                 |                 |                       |                               |                                |                                |
|--------------------|---------------------------|----------------|-----------------|-----------------|-----------------------|-----------------|-----------------|-----------------|-----------------|-----------------------|-------------------------------|--------------------------------|--------------------------------|
|                    | (mg L <sup>-1</sup> )     |                |                 |                 | (μg L <sup>-1</sup> ) |                 |                 |                 |                 | (mg L <sup>-1</sup> ) |                               |                                |                                |
|                    | Na <sup>a</sup>           | K <sup>a</sup> | Ca <sup>a</sup> | Mg <sup>a</sup> | Al <sup>b</sup>       | Cr <sup>b</sup> | Cu <sup>b</sup> | Fe <sup>b</sup> | Zn <sup>b</sup> | Cl <sup>-c</sup>      | NO <sub>3</sub> <sup>-c</sup> | SO <sub>4</sub> <sup>2-c</sup> | PO <sub>4</sub> <sup>3-c</sup> |
| Min                | 0.3                       | 0.4            | 13.4            | 1.6             | 2                     | 0.4             | 1               | 1               | 1               | 0.7                   | 0.4                           | 0.3                            | 0.1                            |
| Max                | 645                       | 15             | 267             | 202             | 33                    | 3.4             | 226             | 860             | 40              | 390                   | 5125                          | 760                            | 2.5                            |
| Average            | 157                       | 5.4            | 71              | 37              | 5                     | 0.8             | 20              | 90              | 7               | 78                    | 456                           | 84                             | 0.3                            |
| Standard deviation | 241                       | 5.9            | 76              | 67              | 3                     | 0.8             | 50              | 230             | 12              | 130                   | 1400                          | 204                            | 0.6                            |

<sup>a</sup> – determined by ICP-OES; <sup>b</sup> – determined by ICP-MS; <sup>c</sup> – determined by ion chromatography

<sup>d</sup> – vegetable, fruit, brown bread, rice, meat and chicken organs, food supplements

<sup>e</sup> – tap water, still, sparkling, river, well and waste water
